# Supplementary material
Source: PubMed Central journal article supplement (PMC5341235)

## **Supporting Information**

### **Supporting Methods**

#### *Isolation and osteogenic differentiation of bone-marrow-derived stromal cells*

Primary mouse bone marrow stromal cells (BMSCs) were isolated and propagated from 6-week-old male C57BL/6 mice. Mice were euthanized; tibiae, femurs and spine were removed and excess soft tissue was eliminated. Using a pestle and mortar, the bones were crushed and washed in PBS with 0.5% FBS and passed through a 40-mm filter into a collection tube. Cells were spun at 1,500 r.p.m. for 5 min; the supernatant was removed, and washed once with PBS. After pelleting once again, the cells were resuspended and plated in  $\alpha$ MEM, 15% FBS, and penicillin and streptomycin solution (Invitrogen) and incubated at 37°C in humidified air with 5% CO<sub>2</sub>. After 3 weeks of culture and expansion, plastic adherent cells were then harvested and cultured in  $\alpha$ MEM, 10% FBS, and penicillin and streptomycin solution (Invitrogen) and incubated at 37°C in humidified air with 5% CO<sub>2</sub>. To assess osteogenic differentiation, BMSCs were plated at  $5 \times 10^4$  cells per well in a 24-well plate at 37°C in osteogenic induction medium:  $\alpha$ MEM, 10% FBS, 50  $\mu$ g/ml ascorbic acid, 10 mM  $\beta$ -glycerol phosphate, and 10 nM dexamethasone (Sigma).

#### *Cell cultures*

C3H/10T1/2 cells were cultured in Dulbecco's modified Eagle's medium (DMEM) containing 10% FBS and 1% penicillin/streptomycin. MC3T3-E1 cells were grown in  $\alpha$ -MEM supplemented with 10% FBS and 1% penicillin/streptomycin to confluency (Day 0). To induce differentiation, the culture medium was replaced with  $\alpha$ -MEM containing 50  $\mu$ g/ml ascorbic acid and 5 mM  $\beta$ -glycerophosphate. The culture medium was changed every 2-3 days.

**Supporting Table 1.**

**Table 1. Primers used for Real time PCR**

| <b>Gene</b>   | <b>Primer (Forward/Reverse)</b>      |
|---------------|--------------------------------------|
| <i>Cebpd</i>  | (F) 5' -ATCGCTGCAGCTTCCTATGT-3'      |
|               | (R) 5' -AGTCATGCTTTCCCGTGTTTC-3'     |
| <i>Ccne1</i>  | (F) 5' -CAGAGCAGCGAGCAGGAGA-3'       |
|               | (R) 5' -CAGCTGCTTCCACACCACTG-3'      |
| <i>Runx2</i>  | (F) 5' -CAGGAAGACTGCAAGAAGGCTCTGG-3' |
|               | (R) 5' -ACACGGTGTCACTGCGCTGAAGA-3'   |
| <i>OC</i>     | (F) 5' -CTCTGTCTCTCTGACCTCACAG-3'    |
|               | (R) 5' -GGAGCTGCTGTGACATCCATAC-3'    |
| <i>Osx</i>    | (F) 5' -CCTCTGCGGGACTCAACAAC-3'      |
|               | (R) 5' -AAAGGTCAGCGTATGGCTTCTT-3'    |
| <i>Nfatc1</i> | (F) 5' -GGAGAGTCCGAGAATCGAGAT-3'     |
|               | (R) 5' -TTGCAGCTAGGAAGTACGTCT-3'     |
| <i>Ctsk</i>   | (F) 5' -AATACCTCCCTCTCGATCCTACA-3'   |
|               | (R) 5' -TGGTTCTTGACTGGAGTAACGTA-3'   |
| <i>Adra1a</i> | (F) 5' -TCTACTTGGGGTGATCTTGGG-3'     |
|               | (R) 5' -CGAGTGCAGATGCCGATGA-3'       |
| <i>Adra1b</i> | (F) 5' -AACCTTGGGCATTGTAGTCG-3'      |
|               | (R) 5' -CTGGAGCACGGGTAGATGAT-3'      |
| <i>Adra1d</i> | (F) 5' -TTCCCCTTTTTCTTCGTCCT-3'      |
|               | (R) 5' -ATTGAAGTAGCCCAGCCAGA-3'      |
| <i>Gapdh</i>  | (F) 5' -TGGAGAAACCTGCCAAGTATG-3'     |
|               | (R) 5' -GGAGACAACCTGGTCCTCAG-3'      |

Forward (F) and Reverse (R) primers are listed.

### **Supporting Figure 1.**

#### **Gene expression of $\alpha_1$ -AR subtypes in bone cells.**

In order to determine the  $\alpha_1$ -AR subtypes expressed by osteoblasts, we performed real-time PCR using primers specific for each receptor subtype in BMSCs and MC3T3-E1 cells. Relative mRNA expression was normalized to *Gapdh*. Figures are representative of data from six independent determinations.  $\alpha_{1A}$ -AR,  $\alpha_{1B}$ -AR, and  $\alpha_{1D}$ -AR transcripts were detected in C3H10T1/2 cells as a positive control. ND, not detected.

### **Supporting Figure 2.**

#### **PHE stimulated cellular proliferation in BMSCs.**

Cells were treated with PHE at 0.03 to 0.3  $\mu$ M for 24 h, followed by the determination of BrdU incorporation (mean  $\pm$  SEM). Each value represents the means  $\pm$  SEM of six independent determinations. \*,  $P < 0.05$ , significantly different from control value.

## Supporting Figure 1.

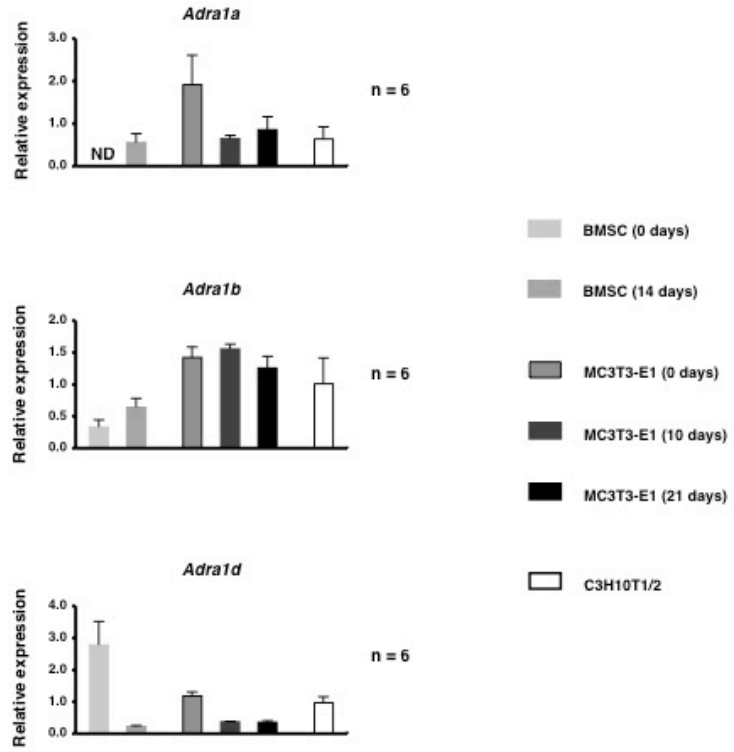

## Supporting Figure 2.

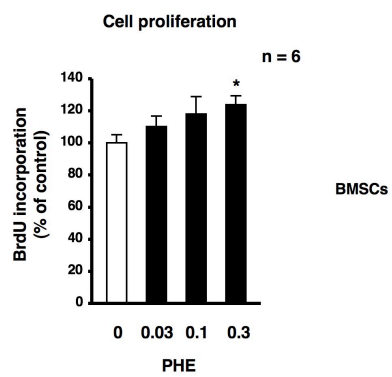

Supplement: BPH-173-1058-s001.pdf [file BPH-173-1058-s001.pdf]
